# Supplementary material
Source: PubMed Central journal article supplement (PMC4251067)
Supplement: CC-050-C4CC04572F-s001.pdf [file CC-050-C4CC04572F-s001.pdf]

Supplementary Information for:

**Synthesis and Vibrational Spectroscopy of  $^{57}\text{Fe}$ -Labeled Models of [NiFe]  
Hydrogenase: First Direct Observation of a Nickel-Iron Interaction**

David Schilter,<sup>a</sup> Vladimir Pelmeshnikov,<sup>b</sup> Hongxin Wang,<sup>c,d</sup> Florian Meier,<sup>b</sup> Leland B. Gee,<sup>c</sup> Yoshitaki Yoda,<sup>e</sup> Martin Kaupp,<sup>b</sup> Thomas B. Rauchfuss,<sup>a</sup> and Stephen P. Cramer<sup>c,d</sup>

<sup>a</sup>Department of Chemistry, University of Illinois at Urbana-Champaign,  
Urbana, IL 61801, USA

<sup>b</sup>Institut für Chemie, Technische Universität Berlin, 10623 Berlin, Germany

<sup>c</sup>Department of Chemistry, University of California, Davis, CA 95616, USA

<sup>d</sup>Physical Biosciences Division, Lawrence Berkeley National Laboratory,  
Berkeley, CA 94720, USA

<sup>e</sup>JASRI, SPring-8, Sayo-gun, Hyogo 679-5198, Japan

**Contents**

|                                                                                                                                                        |    |
|--------------------------------------------------------------------------------------------------------------------------------------------------------|----|
| List of Figures.....                                                                                                                                   | 1  |
| List of Tables .....                                                                                                                                   | 2  |
| Syntheses .....                                                                                                                                        | 2  |
| General considerations.....                                                                                                                            | 2  |
| Conversion of $\text{I}_2\text{Fe}(\text{pdt})\text{Ni}(\text{dppe})$ to $(\text{OC})_3\text{Fe}(\text{pdt})\text{Ni}(\text{dppe})$ ( <b>1</b> ) ..... | 2  |
| $(\text{OC})_3^{57}\text{Fe}(\text{pdt})\text{Ni}(\text{dppe})$ ( <b>1'</b> ) .....                                                                    | 4  |
| $[(\text{OC})_3^{57}\text{Fe}(\text{pdt})\text{Ni}(\text{dppe})]\text{BF}_4$ ( <b>[1']BF<sub>4</sub></b> ) .....                                       | 6  |
| NRVS.....                                                                                                                                              | 7  |
| DFT Calculations.....                                                                                                                                  | 8  |
| References.....                                                                                                                                        | 14 |

**List of Figures**

|                                                                                                                                                                                               |    |
|-----------------------------------------------------------------------------------------------------------------------------------------------------------------------------------------------|----|
| Fig. S1 Positive ion ESI mass spectrum of <b>[1']BF<sub>4</sub></b> .....                                                                                                                     | 3  |
| Fig. S2 $^{31}\text{P}\{^1\text{H}\}$ NMR spectrum ( $\text{CH}_2\text{Cl}_2$ , 202 MHz) of <b>1'</b> .....                                                                                   | 4  |
| Fig. S3 Observed DFT calculated IR spectra of <b>[1']<sup>+</sup></b> and <b>1'</b> in the $\nu_{\text{CO}}$ region.....                                                                      | 5  |
| Fig. S4 Positive ion LI-FDI mass spectrum of <b>1</b> and <b>1'</b> .....                                                                                                                     | 5  |
| Fig. S5 Positive ion ESI mass spectrum of <b>[1']BF<sub>4</sub></b> .....                                                                                                                     | 6  |
| Fig. S6 X-band EPR spectrum of <b>[1]BF<sub>4</sub></b> and <b>[1']BF<sub>4</sub></b> .....                                                                                                   | 6  |
| Fig. S7 Experimental and simulated X-band EPR spectrum of <b>[1']BF<sub>4</sub></b> .....                                                                                                     | 7  |
| Fig. S8 X-ray structures of <b>1</b> and <b>[1]<sup>+</sup></b> analog $[(\text{CO})_3\text{Fe}(\text{pdt})\text{Ni}(\text{dcpe})]^+$ .....                                                   | 9  |
| Fig. S9 Observed and DFT calculated NRVS ( $^{57}\text{Fe}$ PVDOS) data for <b>1'</b> and <b>[1]<sup>+</sup></b> .....                                                                        | 10 |
| Fig. S10 Scaled arrow depiction of nuclear displacements for selected normal modes with significant Fe-Ni character calculated for <b>1'</b> (157, 266, 311, and 386 $\text{cm}^{-1}$ ) ..... | 11 |
| Fig. S11 ELF and ELI-D analyses of the Fe-Ni bonding in <b>[1]<sup>0/+</sup></b> .....                                                                                                        | 12 |
| Fig. S12 QTAIM topologic and total electron density Laplacian analyses of the Fe-Ni bonding in <b>[1]<sup>0/+</sup></b> .....                                                                 | 13 |

## List of Tables

|                                                                                                                                                     |    |
|-----------------------------------------------------------------------------------------------------------------------------------------------------|----|
| Table S1 EPR simulation parameters for the two conformers of [1']BF <sub>4</sub> .....                                                              | 7  |
| Table S2 Metal-metal and metal-ligand internuclear distances (Å) in [1] <sup>0/+</sup> from X-ray data analyses and DFT optimization.....           | 9  |
| Table S3 Peak frequencies (cm <sup>-1</sup> ) for experimental NRVS/IR bands of [1] <sup>0/+</sup> and their equivalents from DFT calculations..... | 10 |

## Syntheses

### *General considerations*

All reactions not involving CO were conducted in an MBraun glovebox equipped with a solvent purification system; the concentrations of O<sub>2</sub> and H<sub>2</sub>O in the N<sub>2</sub> atmosphere were typically no higher than 2 and 0.2 ppm, respectively. Unless otherwise stated, all chemicals were purchased from commercial sources and used as received. The solvents CD<sub>2</sub>Cl<sub>2</sub> and <sup>i</sup>PrOH were distilled from CaH<sub>2</sub> and FcBF<sub>4</sub> crystallized from CH<sub>2</sub>Cl<sub>2</sub>/hexanes. The complexes Fe<sub>2</sub>I<sub>4</sub>(<sup>i</sup>PrOH)<sub>4</sub>,<sup>1</sup> <sup>57</sup>Fe<sub>2</sub>I<sub>4</sub>(<sup>i</sup>PrOH)<sub>4</sub>,<sup>2</sup> (pdt)Ni(dppe),<sup>3</sup> I<sub>2</sub>Fe(pdt)Ni(dppe)<sup>4</sup> and (OC)<sub>3</sub>Fe(pdt)Ni(dppe)<sup>5</sup> were prepared according to the literature methods. Chromatography was performed using SiO<sub>2</sub> (40 - 63 μm, 230 - 400 mesh) as the stationary phase. Solution IR spectra were recorded on a Perkin-Elmer Spectrum 100 FTIR spectrometer. LI-FDI- and ESI-MS data were collected using a Waters GCT Premier and Waters Micromass Quattro II spectrometer, respectively. In each case analytes were injected as dilute CH<sub>2</sub>Cl<sub>2</sub> solutions. Analytical data were acquired using an Exeter Analytical CE-440 elemental analyzer. NMR data were acquired at room temperature, with samples under an atmosphere of N<sub>2</sub>. <sup>1</sup>H, <sup>13</sup>C{<sup>1</sup>H} and <sup>31</sup>P{<sup>1</sup>H} NMR spectra were recorded on a Varian VXR500 spectrometer at 500, 126 and 202 MHz, respectively. Chemical shifts (in ppm) are referenced to CHDCl<sub>2</sub>/CH<sub>2</sub>Cl<sub>2</sub> (5.32 ppm for <sup>1</sup>H) and external 85% H<sub>3</sub>PO<sub>4</sub> (0 ppm for <sup>31</sup>P). EPR spectra (~1 mM in CH<sub>2</sub>Cl<sub>2</sub>/PhMe, 1:1) were recorded on a Varian E-line 12" Century Series X-band CW spectrometer at 110 K.

### *Conversion of I<sub>2</sub>Fe(pdt)Ni(dppe) to (OC)<sub>3</sub>Fe(pdt)Ni(dppe) (1)*

A solution of I<sub>2</sub>Fe(pdt)Ni(dppe) (26.2 mg, 30 μmol) in CH<sub>2</sub>Cl<sub>2</sub> (1 mL) was treated with a suspension of AgBF<sub>4</sub> (5.8 mg, 30 μmol) in CH<sub>2</sub>Cl<sub>2</sub> (2 mL) and the mixture stirred under CO (1 atm) in the absence of light. After 24 h, the suspension was filtered through Celite and the filtrate cooled to -28°C, whereupon CoCp<sub>2</sub> (11.3 mg, 60 μmol) in CH<sub>2</sub>Cl<sub>2</sub> (1 mL) was added. The solution was concentrated to ~1 mL and chromatographed (~5 cm SiO<sub>2</sub>, CH<sub>2</sub>Cl<sub>2</sub> eluent). The first band, deep green in color, was collected and treated with CH<sub>3</sub>CN (5 mL). The solution was concentrated to ~0.5 mL, whereupon a solid formed. The material was isolated by filtration, washed with CH<sub>3</sub>CN (2 × 5 mL), Et<sub>2</sub>O (2 × 5 mL) and pentane (2 × 5 mL), and dried briefly to afford the title compound as dark green crystals (13.9 mg, 20 μmol, 66%). Characterization data were identical to those previously reported.

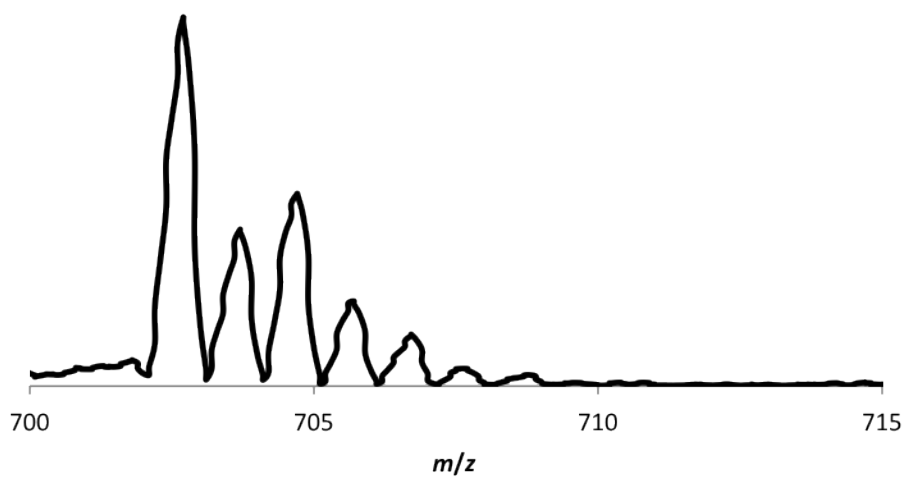

**Fig. S1** Positive ion ESI mass spectrum of [1']BF<sub>4</sub>.

*(OC)<sub>3</sub><sup>57</sup>Fe(pdt)Ni(dppe) (1')*

A suspension of <sup>57</sup>Fe<sub>2</sub>I<sub>4</sub>(<sup>i</sup>PrOH)<sub>4</sub> (34.5 mg, 40 μmol) in CH<sub>2</sub>Cl<sub>2</sub> (1 mL) was treated with (pdt)Ni(dppe) (22.5 mg, 40 μmol) in CH<sub>2</sub>Cl<sub>2</sub> (1 mL), and the mixture rapidly stirred for 2 h. A suspension of AgBF<sub>4</sub> (23.4 mg, 120 μmol) in CH<sub>2</sub>Cl<sub>2</sub> (5 mL) was added and the mixture stirred under CO (1 atm) in the absence of light. After 24 h, the suspension was filtered through Celite and the filtrate cooled to -28°C, whereupon CoCp<sub>2</sub> (22.7 mg, 120 μmol) in CH<sub>2</sub>Cl<sub>2</sub> (1 mL) was added. The solution was concentrated to ~1 mL and chromatographed rapidly (~5 cm SiO<sub>2</sub>, CH<sub>2</sub>Cl<sub>2</sub> eluent). The first band, deep green in color, was collected and treated with CH<sub>3</sub>CN (5 mL). The solution was concentrated to ~0.5 mL, whereupon a solid formed. The material was isolated by filtration, washed with CH<sub>3</sub>CN (2 × 5 mL), Et<sub>2</sub>O (2 × 5 mL) and pentane (2 × 5 mL), and dried briefly to afford the title compound as dark green crystals (9.9 mg, 14 μmol, 35%).

<sup>31</sup>P{<sup>1</sup>H} NMR (CH<sub>2</sub>Cl<sub>2</sub>) 61.8 ppm. FTIR (CH<sub>2</sub>Cl<sub>2</sub>): ν<sub>CO</sub> = 2029, 1957 cm<sup>-1</sup>. LI-FDI-MS: *m/z* 702.9 [M]<sup>+</sup>, 674.9 [M - CO]<sup>+</sup>. Anal. calcd for C<sub>32</sub>H<sub>30</sub>O<sub>3</sub>S<sub>2</sub>P<sub>2</sub>Ni<sup>57</sup>Fe: C, 54.57; H, 4.29; N, 0.00. Found: C, 54.26; H, 3.86; N, 0.00.

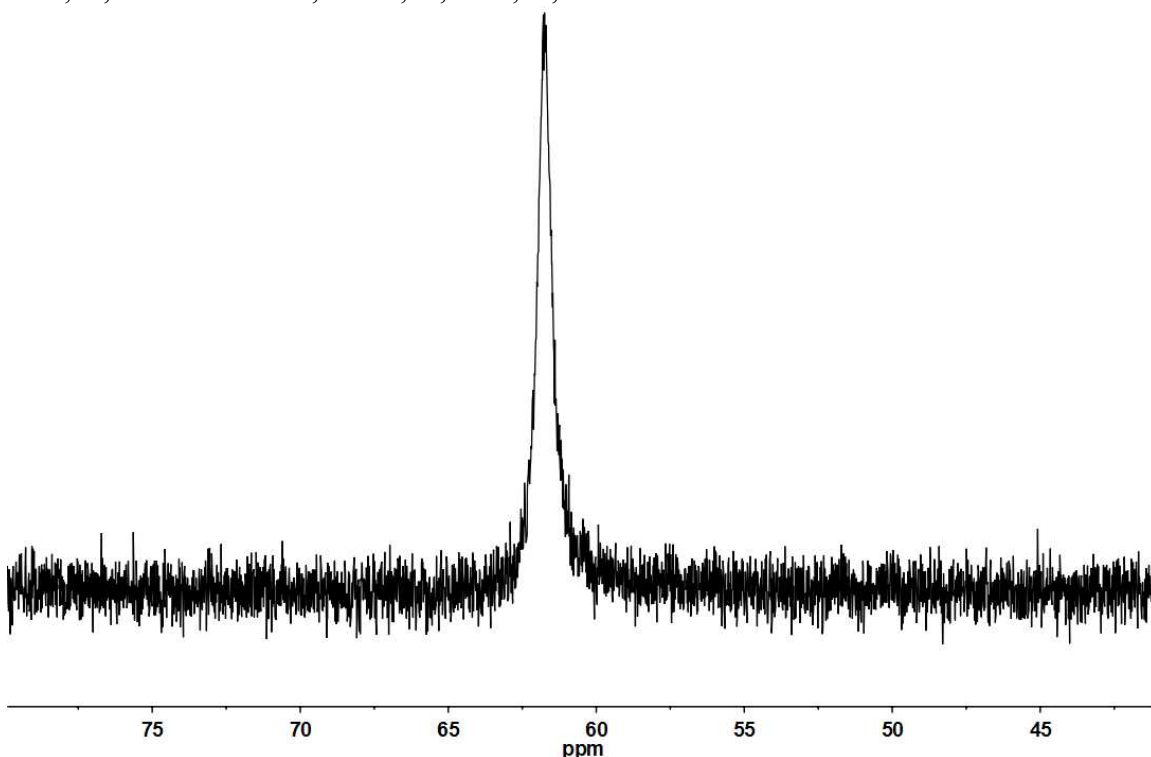

Fig. S2 <sup>31</sup>P{<sup>1</sup>H} NMR spectrum (CH<sub>2</sub>Cl<sub>2</sub>, 202 MHz) of **1'**.

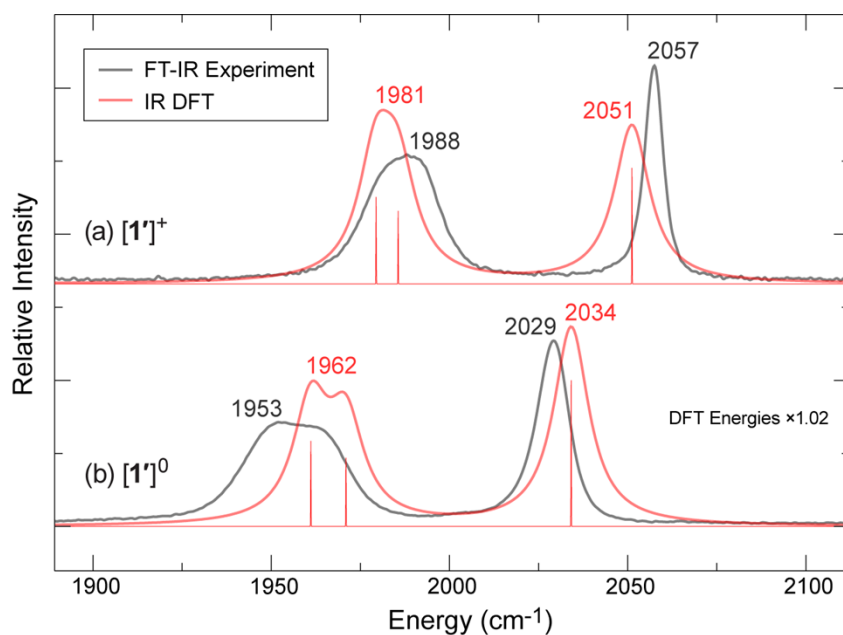

**Fig. S3** Observed (black) and DFT calculated (red) IR spectra of (a)  $[1']^+$  and (b)  $1'$  in the  $\nu_{\text{CO}}$  region. The stick spectra from DFT indicate three  $\nu_{\text{CO}}$  normal modes positions, which are mixed  $3\times\text{C-O}$  stretches (two asymmetric stretches forming the lower frequency band, and one symmetric stretch for the higher frequency band; see the electronic SI for the mode animations).  $\text{CH}_2\text{Cl}_2$  solvent was used for observed spectra. 102% scaling of DFT vibrational frequencies was applied.

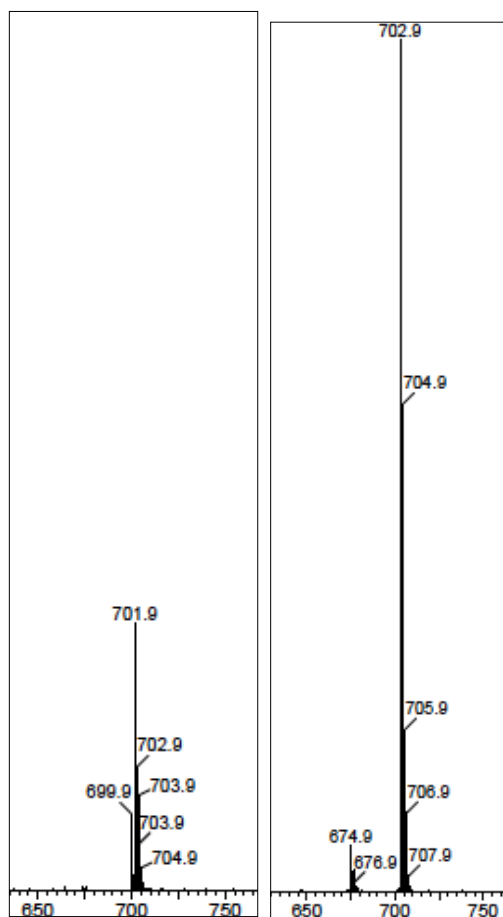

**Fig. S4** Positive ion LI-FDI mass spectrum of  $1$  (left) and  $1'$  (right).

$[(OC)_3^{57}Fe(pdt)Ni(dppe)]BF_4$  ( $[1']BF_4$ )

A stirred solution of **1'** (10.6 mg, 15  $\mu$ mol) in  $CH_2Cl_2$  (1 mL) was treated with  $FcBF_4$  (4.1 mg, 15  $\mu$ mol) in  $CH_2Cl_2$  (1 mL). After 1 min, pentane (20 mL) was added and the mixture allowed to stand overnight at  $-28^\circ C$ . The solids were isolated by filtration, washed with pentane ( $2 \times 1$  mL), and dried briefly to afford the title compound as a brown-olive powder (5.0 mg, 6.3  $\mu$ mol, 42%).

FTIR ( $CH_2Cl_2$ ):  $\nu_{CO} = 2057, 1988\text{ cm}^{-1}$ . ESI-MS:  $m/z$  702.7  $[M - BF_4^-]^+$ . Anal. calcd for  $C_{32}H_{30}O_3S_2P_2Ni^{57}FeBF_4$ : C, 48.59; H, 3.82; N, 0.00. Found: C, 48.18; H, 3.89; N, 0.35.

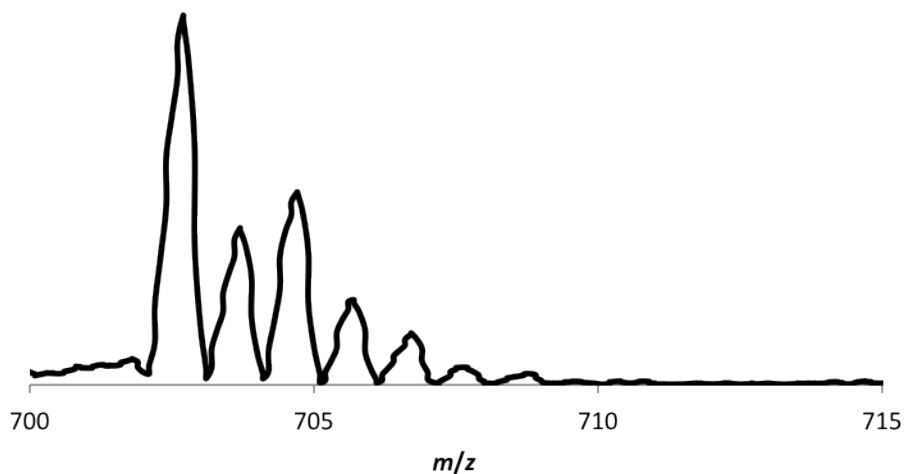

Fig. S5 Positive ion ESI mass spectrum of  $[1']BF_4$ .

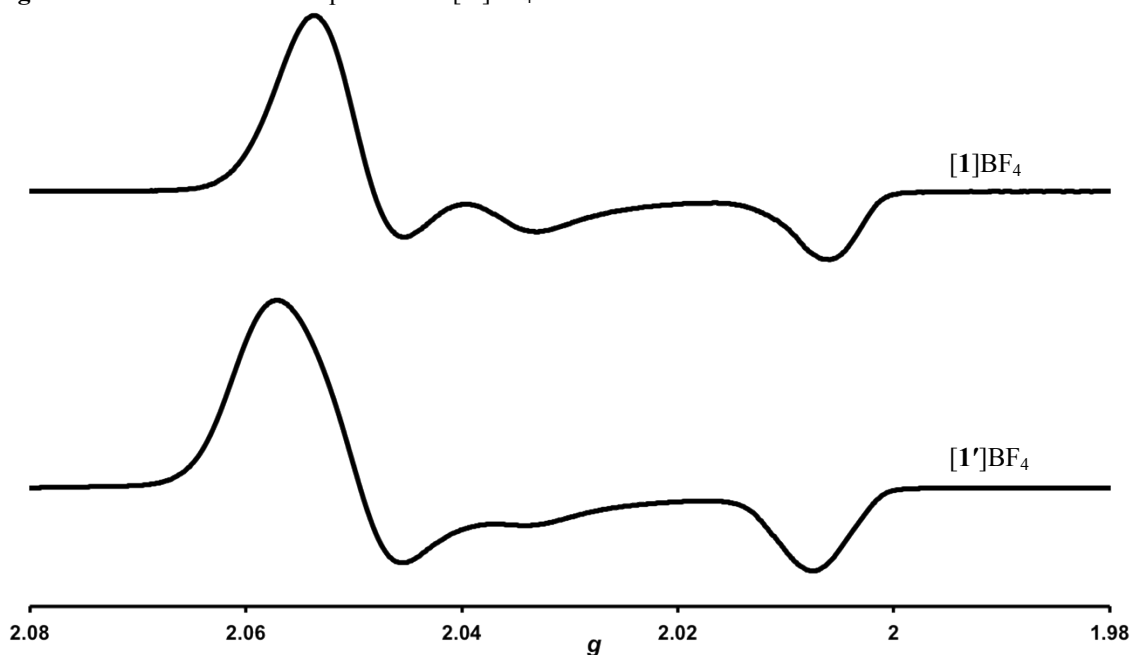

Fig. S6 X-band EPR spectrum of  $[1]BF_4$  and  $[1']BF_4$ .

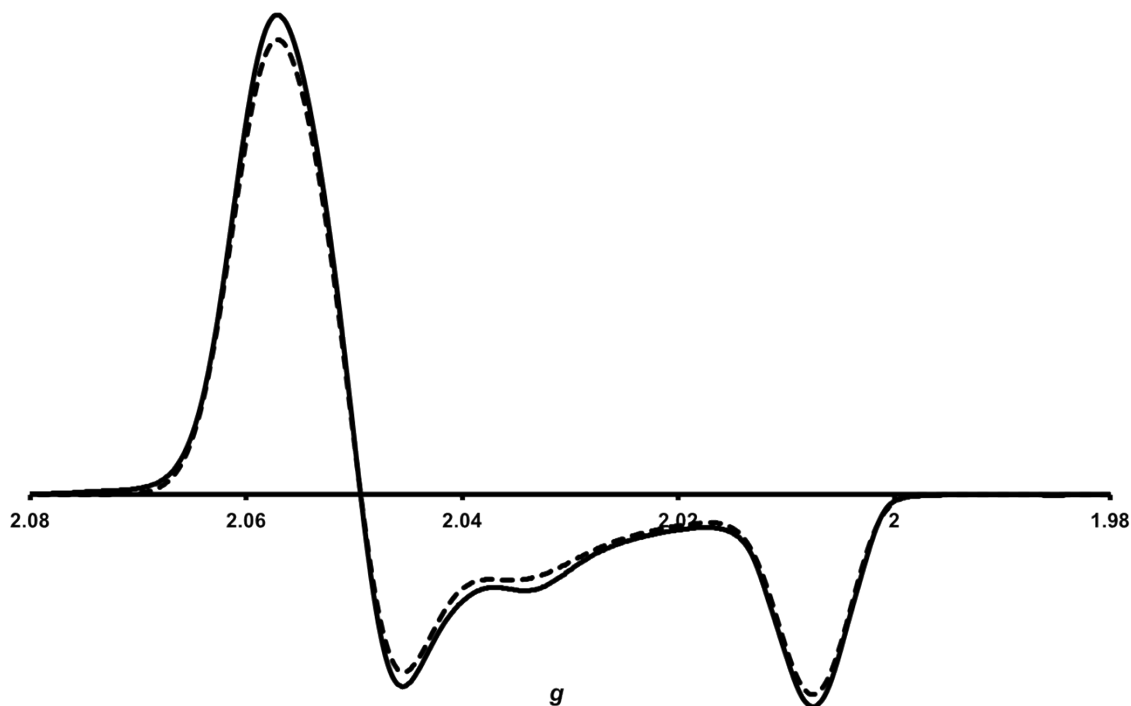

**Fig. S7** X-band EPR spectrum of [1']BF<sub>4</sub> (solid trace) and its simulated spectrum (dashed trace).

**Table S1** EPR simulation parameters for [1']BF<sub>4</sub>. The species is present as two conformers, related by a ring flip in the Fe(pdt) chelate ring.

| <b>g-factor</b>     | <b><i>A</i>(<sup>57</sup>Fe) /MHz</b> | <b>line width /G</b> | <b>relative abundance</b> |
|---------------------|---------------------------------------|----------------------|---------------------------|
| 2.054, 2.053, 2.007 | 24, 27, 14                            | 9, 14, 8             | 0.84                      |
| 2.055, 2.038, 2.009 | 49, 38, 27                            | 16, 12, 10           | 0.16                      |

## NRVS

Data were recorded according to a published procedure<sup>6,7</sup> at SPring-8 BL09XU in Japan. A high heat load [Si(1,1,1)×Si(1,1,1)] monochromator (HMLM) produced 14.4 keV radiation with ~1.0 eV resolution, and a high energy resolution monochromator (HRM) [Ge(4,2,2)×2Si(9,7,5)] produced 14.4 keV radiation with 0.8 meV resolution. The beam flux was ~ 1.4×10<sup>9</sup> photons/s. The solids **1'** and [1']BF<sub>4</sub> were mounted using 1-propanol as the medium, measurements being taken at 30-50 K using a liquid helium cryostat. Sample temperatures were calculated using the ratio of anti-stokes/stokes intensities

$$\frac{S(-E)}{S(E)} = e^{-\frac{E}{kT}}$$

according to: <sup>8-10</sup> Delayed nuclear fluorescence and Fe K fluorescence (from internal conversion) were recorded with a 2×2 APD array. NRVS data were recorded with a step size of 0.28 meV, the counting time per point being 5 s. Analysis was performed using the PHOENIX software package.<sup>7,9</sup>

## DFT Calculations

The initial coordinates for the DFT calculations on the  $[(OC)_3^{57}Fe(pdt)Ni(dppe)]^{0/+}$  ( $[1']^{0/+}$ ) model compounds were based on the X-ray structures of the natural abundance complexes **1**<sup>11</sup> and  $[(OC)_3Fe(pdt)Ni(dcpe)]^+$ ,<sup>12</sup> respectively (Fig. S8). The latter Ni(II)Fe(I) complex was used as the structural reference for  $[1']^+$ , subject to dcpe to dppe ligand replacement. The structure optimization and subsequent normal mode analysis were done using GAUSSIAN 09,<sup>13</sup> based on the densities exported from single point calculations using JAGUAR 7.9.<sup>14</sup> The BP86<sup>15,16</sup> functional and the LACV3P\*\* basis set as implemented in JAGUAR 7.9 were employed. For the first- and second-row elements, LACV3P\*\* implies 6-311G\*\* triple-zeta basis sets including polarization functions. For the Fe and Ni atoms, LACV3P\*\* consists of a triple-zeta quality basis set for the outermost core and valence orbitals, and the quasirelativistic Los Alamos effective core potential (ECP) for the innermost electrons. The  $[1']^{0/+}$  species environment was considered via self-consistent reaction field (SCRf) polarizable continuum model using the integral equation formalism (IEF-PCM)<sup>17</sup> as implemented in GAUSSIAN 09 with the IEF-PCM parameters at their default values for water. Based on the normal mode outputs, <sup>57</sup>Fe partial vibrational density of states (PVDOS) spectra which complement the NRVS experiment were generated using the Q-SPECTOR program. Q-SPECTOR is an in-house Python tool for analysis of the normal modes calculated using computational chemistry software (here, GAUSSIAN 09), successfully applied earlier.<sup>18-21</sup> To account for the resolution of the present NRVS and IR experiments, the simulated spectra were broadened by convolution with a 6 cm<sup>-1</sup> Lorentzian. A homogeneous empirical scaling of the calculated frequencies was applied to provide improved (and otherwise apparent) mapping between the observed and calculated spectral features: by 108/98% in the 0-400/400-650 cm<sup>-1</sup> ranges, respectively, for the NRVS bands (Fig. S9), and by 102% for the  $\nu_{CO}$  IR bands around ~2000 cm<sup>-1</sup> (Fig. S3). The observed vs. calculated bands correspondence is further provided in Table S3.

Our results on the electronic structure of <sup>57</sup>Fe  $[1']^{0/+}$  complexes are in line with previous DFT studies on the natural abundance variants  $[1]^0$ <sup>11,22</sup> and  $[1]^+$ .<sup>12</sup> The reduced  $[1']^0$  species (metal oxidation levels Ni(I)Fe(I), total spin  $S = 0$ ) displays essentially zero spin population at both the metal centers even in case open-shell (spin-unrestricted) DFT formalism is applied. The calculations on the  $1e^-$  oxidized  $[1']^+$  species (metal oxidation levels Ni(II)Fe(I), total spin  $S = 1/2$ ) verify the unpaired electron to reside at the Fe(I) center. Notably, when  $1e^-$  was added to the  $[1']^+$  species solution (*i.e.*, using the optimized  $[1']^+$  structure *and* electron density as an initial guess) and open-shell  $S = 0$  singlet formalism was applied, the resulting species displayed Ni(I)Fe(I) character and zero spin populations, similarly to  $[1']^0$ .

Notably, our attempts to vary the DFT methodology described above using (i) alternative functionals (non-hybrid PBE<sup>23,24</sup> and hybrid B3LYP<sup>25,26</sup>), (ii) larger basis set (adding '+' diffuse functions), (iii) two-body D3 dispersion corrections by Grimme *et al.*,<sup>27,28</sup> and (iv) options on the SCRf procedure did not produce any better correspondence between the calculated <sup>57</sup>Fe PVDOS and experimental NRVS spectra for  $[1']^{0/+}$ .



The wavefunctions were analyzed using the DGrid program<sup>29</sup> by means of the electron localization function (ELF),<sup>30</sup> the electron localizability indicator based on the parallel-spin electron pair density (ELI-D)<sup>31</sup> and the Laplacian of the electron density and bond-path analyses within the quantum theory of atoms in molecules (QTAIM).<sup>32</sup> For this purpose, the Kohn-Sham orbitals of the single point calculations in GAUSSIAN 09 (basis sets and functional see above) were transferred to DGrid and the examined property was calculated on a grid with 50 points per Bohr. The results of ELF, ELI-D, QTAIM, density Laplacian and bond-path analyses were visualized using the Paraview program,<sup>33</sup> with the results presented in Fig. S11 and Fig. S12.

**Table S2** Metal-metal and metal-ligand internuclear distances (Å) in  $[1]^{0+}$  from X-ray data analyses and DFT optimization.<sup>a</sup>

|       | $[1]^0$             |       | $[1]^+$              |       |
|-------|---------------------|-------|----------------------|-------|
|       | X-ray <sup>11</sup> | DFT   | X-ray <sup>b12</sup> | DFT   |
| Fe–Ni | 2.467               | 2.459 | 2.818                | 2.803 |
| Fe–S1 | 2.284               | 2.331 | 2.289                | 2.328 |
| Fe–S2 | 2.275               | 2.310 | 2.296                | 2.327 |
| Fe–C1 | 1.794               | 1.772 | 1.834                | 1.804 |
| Fe–C2 | 1.800               | 1.774 | 1.799                | 1.728 |
| Fe–C3 | 1.800               | 1.776 | 1.790                | 1.786 |
| Ni–S1 | 2.278               | 2.349 | 2.228                | 2.272 |
| Ni–S2 | 2.231               | 2.286 | 2.235                | 2.261 |
| Ni–P1 | 2.159               | 2.199 | 2.187                | 2.230 |
| Ni–P2 | 2.146               | 2.197 | 2.191                | 2.224 |

<sup>a</sup> Atoms labeled as per Fig. S8.

<sup>b</sup> In absence of X-ray data for  $[(CO)_3Fe(pdt)Ni(dppe)]^+$  ( $[1]^+$ ), data for a very similar complex  $[(CO)_3Fe(pdt)Ni(dcpe)]^+$  is used (Fig. S8), where dcpe has cyclohexyl rings instead of the phenyl rings in dppe.

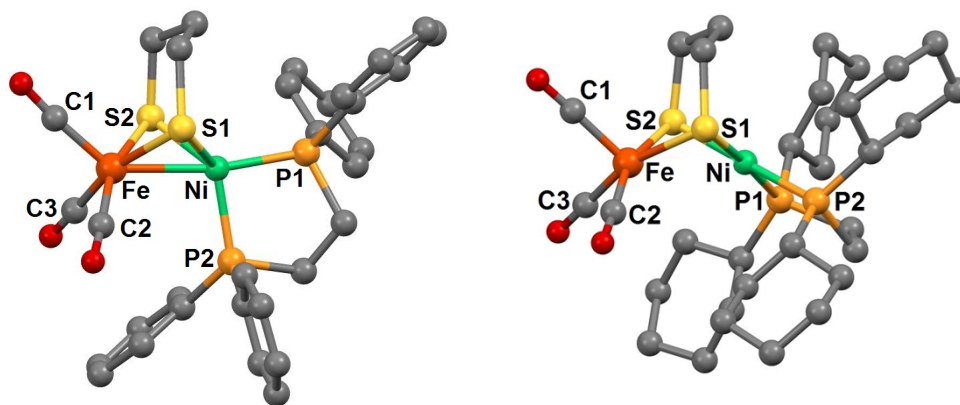

**Fig. S8** X-ray structures of **1** (left) and  $[1]^+$  analog  $[(CO)_3Fe(pdt)Ni(dcpe)]^+$  (right).<sup>11,12</sup>

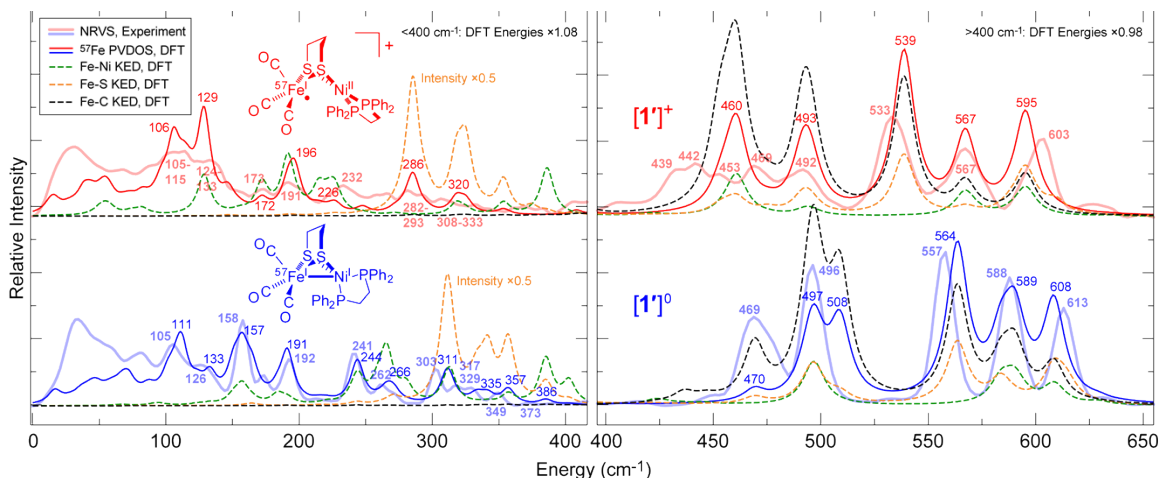

**Fig. S9** Observed and DFT calculated NRVS ( $^{57}\text{Fe}$  PVDOS) data for  $\mathbf{1}'$  (blue, bottom) and  $[\mathbf{1}']^+$  (red, top). The DFT spectra (thin lines) are superimposed with the corresponding experimental spectra in half-transparent (thick lines). Fe-Ni (green), Fe-S (yellow), and Fe-C (black) KED diagrams are provided for both the  $[\mathbf{1}']^{0/+}$  species, based on the DFT results. The left and right panels correspond to 108% and 98% scaling of the DFT vibrational frequencies in the 0-400  $\text{cm}^{-1}$  and 400-650  $\text{cm}^{-1}$  regions, respectively. Correspondence between the observed and calculated bands is provided in Table S3.

**Table S3** Peak frequencies ( $\text{cm}^{-1}$ ) for experimental NRVS/IR bands of  $[\mathbf{1}']^{0/+}$  and their equivalents from DFT calculations.<sup>a</sup>

|                                                        | $[\mathbf{1}']^0$     |                       |                       | $[\mathbf{1}']^+$    |         |            |
|--------------------------------------------------------|-----------------------|-----------------------|-----------------------|----------------------|---------|------------|
|                                                        | Observed              | DFT raw               | DFT scaled            | Observed             | DFT raw | DFT scaled |
| NRVS,<br>100-400 $\text{cm}^{-1}$<br>DFT $\times 1.08$ | 105                   | 103                   | 111                   | 105-115 <sup>c</sup> | 98      | 106        |
|                                                        | 126                   | 123                   | 133                   | 124-133 <sup>c</sup> | 119     | 129        |
|                                                        | 158                   | 145                   | 157                   | 173                  | 159     | 172        |
|                                                        | 192                   | 177                   | 191                   | 191                  | 181     | 196        |
|                                                        | 241                   | 226                   | 244                   | 232                  | 209     | 226        |
|                                                        | 262                   | 246                   | 266                   | 282-293 <sup>c</sup> | 265     | 286        |
|                                                        | 303                   | 288                   | 311                   | 308-333 <sup>c</sup> | 296     | 320        |
|                                                        | 317, 329 <sup>b</sup> | 310                   | 335                   |                      |         |            |
|                                                        | 349                   | 331                   | 357                   |                      |         |            |
|                                                        | 373                   | 357                   | 386                   |                      |         |            |
| NRVS,<br>400-650 $\text{cm}^{-1}$<br>DFT $\times 0.98$ | 469                   | 480                   | 470                   | 435-469 <sup>c</sup> | 470     | 460        |
|                                                        | 496                   | 508, 519 <sup>b</sup> | 497, 508 <sup>b</sup> | 492                  | 504     | 493        |
|                                                        | 557                   | 576                   | 564                   | 533                  | 551     | 539        |
|                                                        | 588                   | 602                   | 589                   | 567                  | 579     | 567        |
|                                                        | 613                   | 621                   | 608                   | 603                  | 608     | 595        |
| IR,<br>1900-2100 $\text{cm}^{-1}$<br>DFT $\times 1.02$ | 1953                  | 1924                  | 1962                  | 1988                 | 1943    | 1981       |
|                                                        | 2029                  | 1995                  | 2034                  | 2057                 | 2012    | 2051       |

<sup>a</sup> Corresponding experimental (observed) and calculated (scaled DFT) spectra are provided in Figs. 2, Fig. S9 left (NRVS, 100-400  $\text{cm}^{-1}$ ), Fig. S9 right (NRVS, 400-650  $\text{cm}^{-1}$ ), and Fig. S3 (IR, 1900-2100  $\text{cm}^{-1}$ ).

The band positions rounded to the nearest  $\text{cm}^{-1}$ . Homogeneous scaling factors were applied to the raw DFT frequencies, as specified in the leftmost column and explained in the text. Animations of the DFT normal modes producing the NRVS/IR bands listed is available as part of the electronic SI.

<sup>b</sup> Correspondence can only be provided between a pair of experimental bands and single calculated band, or vice versa.

<sup>c</sup> Complex set of experimental features matching a single calculated band.

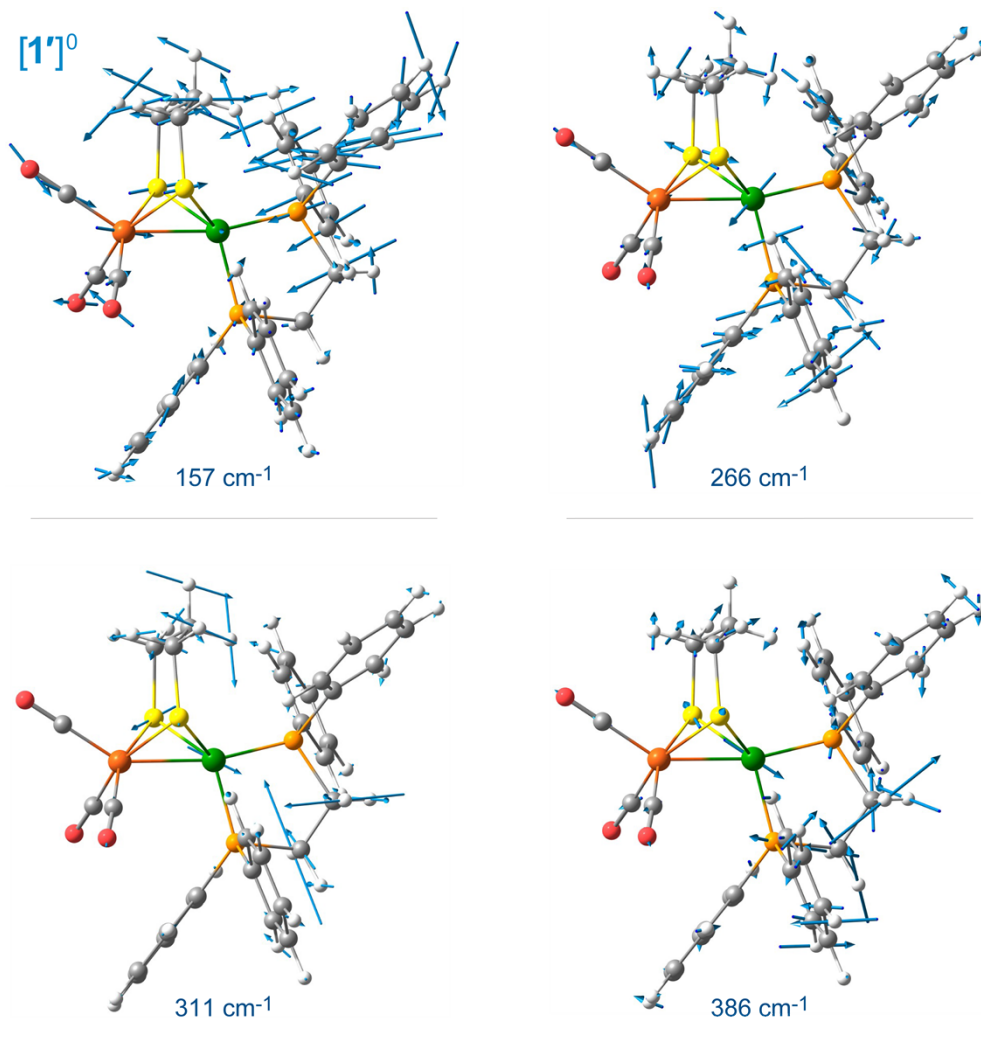

**Fig. S10** Scaled arrow depiction of nuclear displacements for selected normal modes with significant Fe-Ni character calculated for  $1'$  (157, 266, 311, and 386  $\text{cm}^{-1}$ ). Animated representations of all the significant  $[1']^{0/+}$  modes are available in the electronic SI.

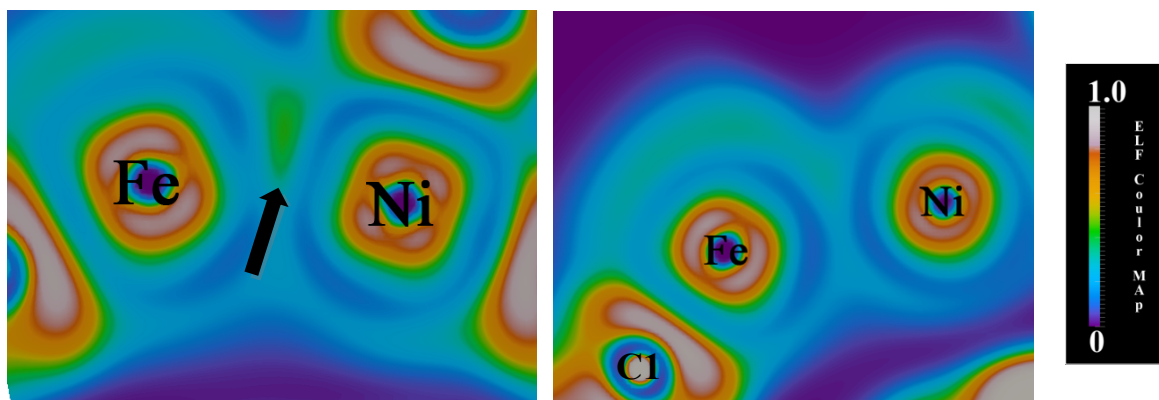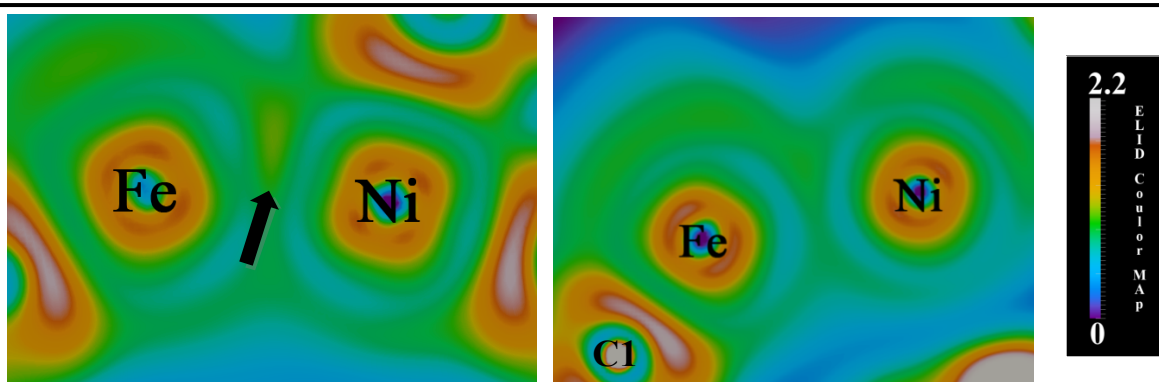

---

**Fig. S11** ELF (top) and ELI-D (bottom) analyses of the Ni–Fe bonding in [1]<sup>0+</sup> (left/right) with the corresponding color map legends (far right). Ni–Fe bond attractor positions for [1]<sup>0</sup> are indicated by the arrows. Plots are shown in the Fe–Ni–C1 plane with atoms labeled as in Fig. S8.

Red Point = Attractor  
Blue Point = Ring Critical Point  
Green Point = Saddle Point  
Yellow Point = Minimum

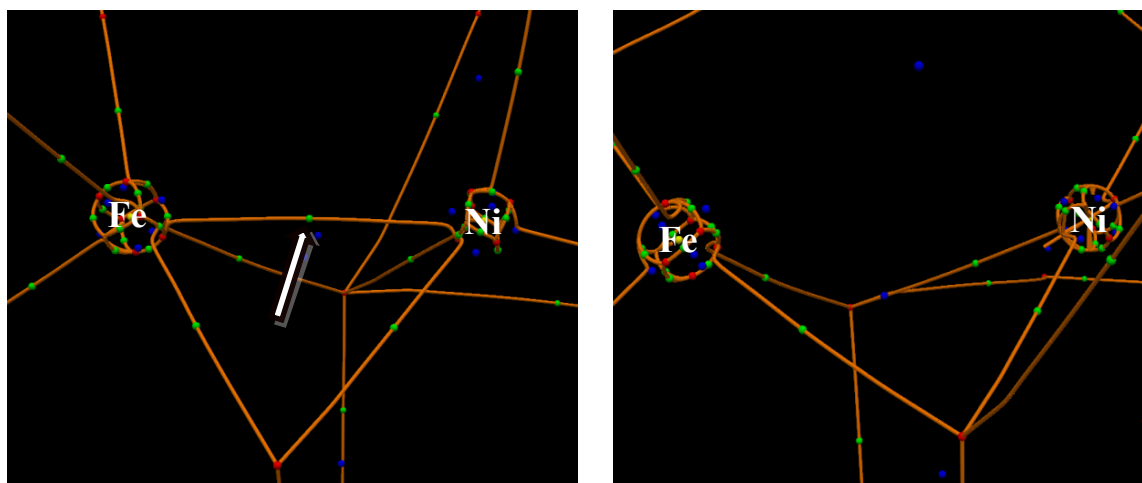

QAIM Topology: 1

QAIM Topology: [1]<sup>+</sup>

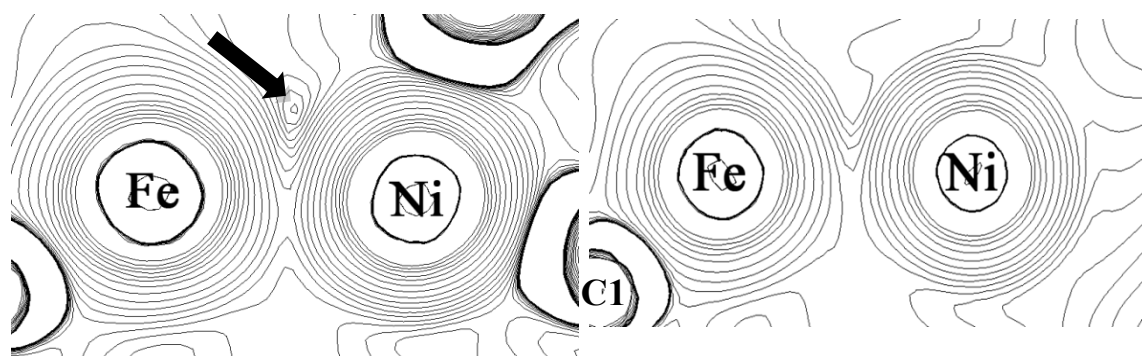

Laplacian Plot: 1

Laplacian Plot: [1]<sup>+</sup>

**Fig. S12** QAIM topologic (top) and total electron density Laplacian (bottom) of Ni–Fe bonding in [1]<sup>0/+</sup> (left/right). The position of the bond critical point and of the Laplacian attractor for [1]<sup>0</sup> are indicated by the arrows. Plots are shown in the Fe–Ni–C1 plane with atoms labeled as in Fig. S8.

## References

- 1 G. G. Nunes, R. C. R. Bottini, D. M. Reis, P. H. C. Camargo, D. J. Evans, P. B. Hitchcock, G. J. Leigh, E. L. Sá, J. F. Soares, *Inorg. Chim. Acta*, 2004, **357**, 1219.
- 2 M. E. Carroll, J. Chen, D. E. Gray, J. C. Lansing, T. B. Rauchfuss, D. Schilter, P. I. Volkers, S. R. Wilson, *Organometallics*, 2014, **33**, 858.
- 3 M. Schmidt, G. G. Hoffmann, *J. Organomet. Chem.*, 1977, **124**, c5.
- 4 D. Schilter, T. B. Rauchfuss, *Dalton Trans.*, 2012, **41**, 13324.
- 5 B. E. Barton, T. B. Rauchfuss, *J. Am. Chem. Soc.*, 2010, **132**, 14877.
- 6 Y. Guo, H. Wang, Y. Xiao, S. Vogt, R. K. Thauer, S. Shima, P. I. Volkers, T. B. Rauchfuss, V. Pelmeshnikov, D. A. Case, E. Alp, W. Sturhahn, Y. Yoda, S. P. Cramer, *Inorg. Chem.*, 2008, **47**, 3969.
- 7 S. P. Cramer, Y. Xiao, H. Wang, Y. Guo, M. C. Smith, *Hyperfine Interact.*, 2006, **170**, 47.
- 8 M. C. Smith, Y. Xiao, H. Wang, S. J. George, D. Coucouvanis, M. Koutmos, W. Sturhahn, E. E. Alp, J. Zhao, S. P. Cramer, *Inorg. Chem.*, 2005, **44**, 5562.
- 9 W. Sturhahn, T. S. Toellner, E. E. Alp, X. Zhang, M. Ando, Y. Yoda, S. Kikuta, M. Seto, C. W. Kimball, B. Dabrowski, *Phys. Rev. Lett.*, 1995, **74**, 3832.
- 10 H. Wang, Y. Yoda, S. Kamali, Z.-H. Zhou, S. P. Cramer, *J. Synchrotron Rad.*, 2012, **19**, 257.
- 11 W. Zhu, W. A. C. Marr, Q. Wang, F. Neese, D. J. E. Spencer, A. J. Blake, P. A. Cooke, C. Wilson, M. Schröder, *Proc. Nat. Acad. Sci. U.S.A.*, 2005, **102**, 18280.
- 12 D. Schilter, M. J. Nilges, M. Chakrabarti, P. A. Lindahl, T. B. Rauchfuss, M. Stein, *Inorg. Chem.*, 2012, **51**, 2338.
- 13 M. J. Frisch, G. W. Trucks, H. B. Schlegel, G. E. Scuseria, M. A. Robb, J. R. Cheeseman, G. Scalmani, V. Barone, B. Mennucci, G. A. Petersson, H. Nakatsuji, M. Caricato, X. Li, H. P. Hratchian, A. F. Izmaylov, J. Bloino, G. Zheng, J. L. Sonnenberg, M. Hada, M. Ehara, K. Toyota, R. Fukuda, J. Hasegawa, M. Ishida, T. Nakajima, Y. Honda, O. Kitao, H. Nakai, T. Vreven, J. A. Montgomery, Jr., J. E. Peralta, F. Ogliaro, M. Bearpark, J. J. Heyd, E. Brothers, K. N. Kudin, V. N. Staroverov, R. Kobayashi, J. Normand, K. Raghavachari, A. Rendell, J. C. Burant, S. S. Iyengar, J. Tomasi, M. Cossi, N. Rega, J. M. Millam, M. Klene, J. E. Knox, J. B. Cross, V. Bakken, C. Adamo, J. Jaramillo, R. Gomperts, R. E. Stratmann, O. Yazyev, A. J. Austin, R. Cammi, C. Pomelli, J. W. Ochterski, R. L. Martin, K. Morokuma, V. G. Zakrzewski, G. A. Voth, P. Salvador, J. J. Dannenberg, S. Dapprich, A. D. Daniels, Ö. Farkas, J. B. Foresman, J. V. Ortiz, J. Cioslowski, D. J. Fox, *Gaussian 09*, Revision A.02, Gaussian Inc., Wallingford CT, 2009.
- 14 *Jaguar*, version 7.9, Schrödinger, LLC, New York, NY, 2012
- 15 A. D. Becke, *Phys. Rev. A*, 1988, **38**, 3098.
- 16 J. P. Perdew, *Phys. Rev. B*, 1986, **33**, 8822.
- 17 J. Tomasi, B. Mennucci, R. Cammi, *Chem. Rev.*, 2005, **105**, 2999.
- 18 D. Mitra, S. J. George, Y. S. Guo, S. Kamali, S. Keable, J. W. Peters, V. Pelmeshnikov, D. A. Case, S. P. Cramer, *J. Am. Chem. Soc.* 2013, **135**, 2530.
- 19 L. F. Yan, V. Pelmeshnikov, C. H. Dapper, A. D. Scott, W. E. Newton, S. P. Cramer, *Chem. Eur. J.*, 2012, **18**, 16349.
- 20 V. Pelmeshnikov, Y. S. Guo, H. Wang, S. P. Cramer, D. A. Case, *Faraday*

- Discuss.*, 2011, **148**, 409.
- 21 D. Mitra, V. Pelmenschikov, Y. S. Guo, D. A. Case, H. Wang, W. B. Dong, M. L. Tan, T. Ichiye, F. E. Jenney, M. W. W. Adams, Y. Yoda, J. Y. Zhao, S. P. Cramer, *Biochemistry*, 2011, **50**, 5220.
- 22 H. S. Shafaat, K. Weber, T. Petrenko, F. Neese, W. Lubitz, *Inorg. Chem.*, 2012, **51**, 11787.
- 23 J. P. Perdew, K. Burke, M. Ernzerhof, *Phys. Rev. Lett.*, 1996, **77**, 3865.
- 24 J. P. Perdew, K. Burke, M. Ernzerhof, *Phys. Rev. Lett.*, 1997, **78**, 1396.
- 25 C. T. Lee, W. T. Yang, R. G. Parr, *Phys. Rev. B*, 1988, **37**, 785.
- 26 A. D. Becke, *J. Chem. Phys.*, 1993, **98**, 5648.
- 27 S. Grimme, J. Antony, S. Ehrlich, H. Krieg, *J. Chem. Phys.*, 2010, **132**, 154104.
- 28 L. Goerigk, S. Grimme, *Phys. Chem. Chem. Phys.*, 2011, **13**, 6670.
- 29 M. Kohout, DGrid, version 4.6, Radebeul, **2011**.
- 30 A. D. Becke, K. E. Edgecombe, *J. Chem. Phys.* **1990**, *92*, 5397; A. Savin, O. Jepsen, J. Flad, O. K. Andersen, H. Preuss, H. G. Vonschnering, *Angew. Chem. Int. Ed.* **1992**, *31*, 187; M. Kohout, A. Savin, *Int. J. Quantum. Chem.* **1996**, *60*, 875.
- 31 M. Kohout, *Int. J. Quantum. Chem.* **2004**, *97*, 651; M. Kohout, K. Pernal, F. R. Wagner, Y. Grin, *Theor. Chem. Acc.* **2004**, *112*, 453.
- 32 R. F. W. Bader, *Atoms in Molecules: A Quantum Theory*, Oxford University Press, Oxford, **1990**.
- 33 Paraview, version 4.1, Kitware Inc., Clifton Park, New York, USA, **2014**; available from <http://www.paraview.org>.
